# Supplementary material for: Semi-Dirac semimetal in silicene oxide
Source: Royal Society of Chemistry journal article supplement (doi:10.1039/c6cp08439g), 2017-01-01
Supplement: c6cp08439g1.pdf [file c6cp08439g1.pdf]

## Supporting Information (SI) for

# Semi-Dirac Semimetal in Silicene Oxide

Chengyong Zhong,<sup>1</sup> Yuanping Chen,<sup>1,\*</sup> Yuee Xie,<sup>1</sup> Yi-Yang Sun,<sup>2,\*</sup> Shengbai Zhang<sup>2</sup>

<sup>1</sup>*School of Physics and Optoelectronics, Xiangtan University, Xiangtan, Hunan 411105, China*

<sup>2</sup>*Department of Physics, Applied Physics, and Astronomy, Rensselaer Polytechnic Institute, Troy, New York 12180, USA*

\*Email: [chenyp@xtu.edu.cn](mailto:chenyp@xtu.edu.cn), [suny4@rpi.edu](mailto:suny4@rpi.edu)

## 1. The convergence test for energy cutoff

We have tested the total energy per atom of the atomic structures as a function of energy cutoff, as displayed below, for all oxides, sulfides and selenides. According to our test, we chose 550 eV, 350 eV and 300 eV as energy cutoff for oxides, sulfides and selenides, respectively.

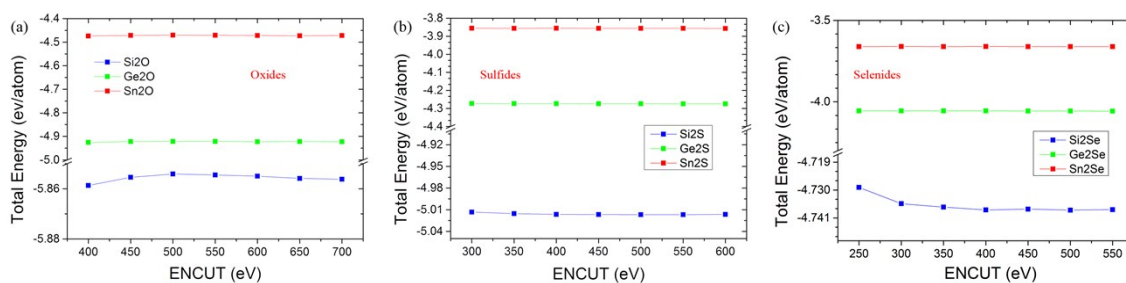

**Figure S1.** (a)-(c) The total energy per atom as a function of energy cutoff for oxides, sulfides and selenides on silicene, germanene and stanene, respectively.

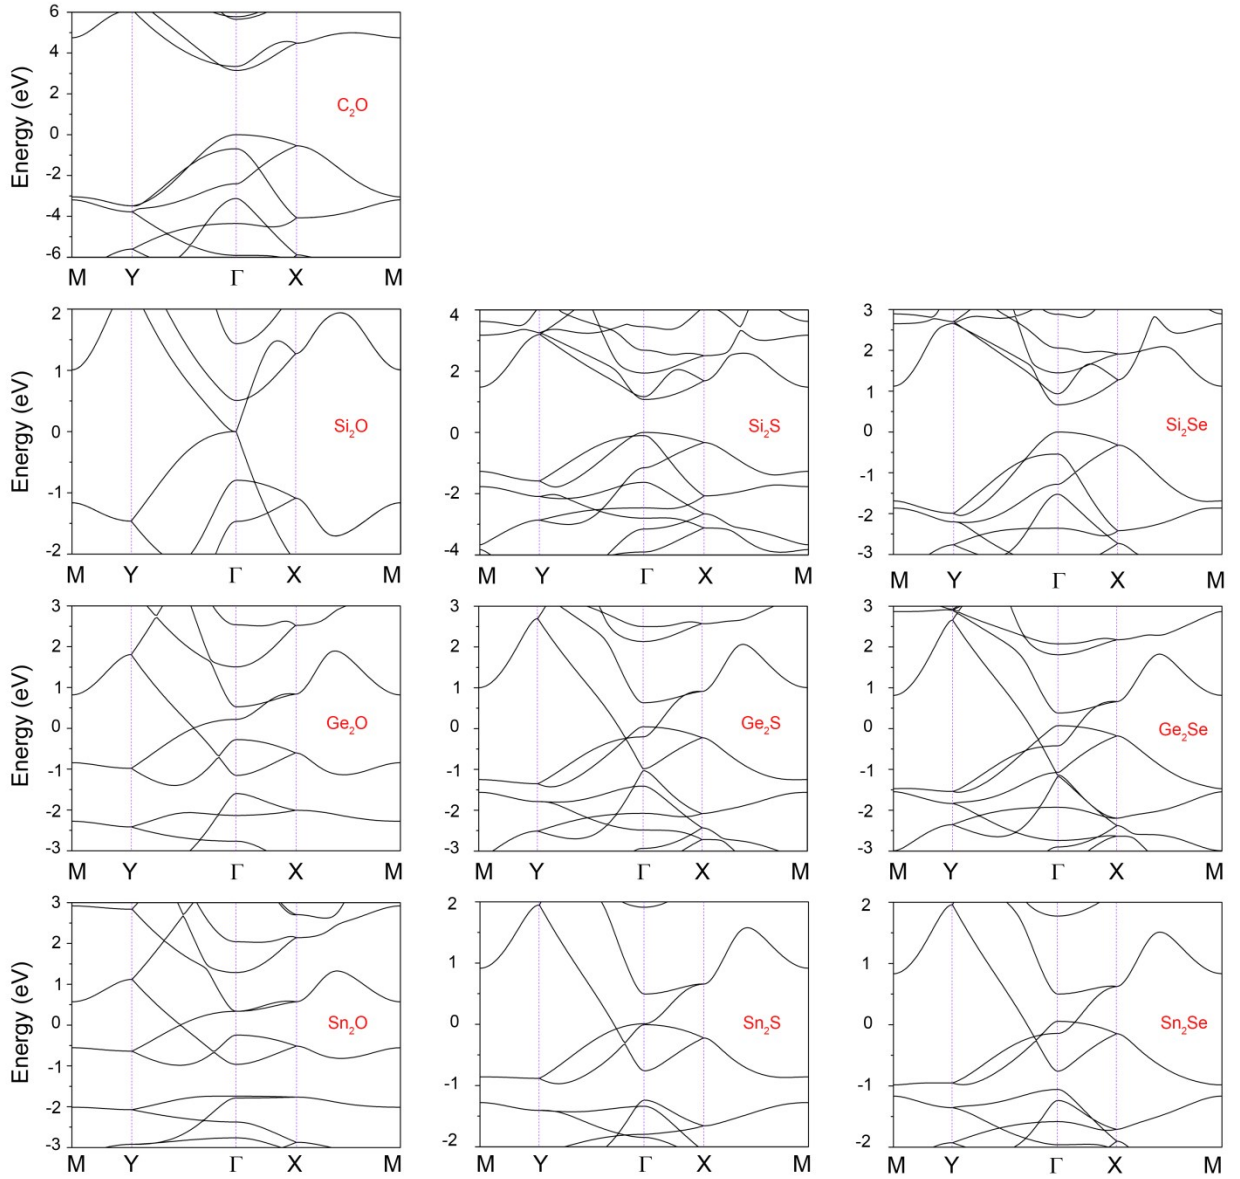

**Figure S2.** The band structures of honeycomb materials modified by group-VI elements. The atomic structures are similar to that in Figure 2a in the main text. The first row shows the results for graphene-based materials, where only graphene oxide was found stable and the sulfide and selenide are not. The second, third and fourth rows show the results for modified silicene, germanene and stanene, respectively.

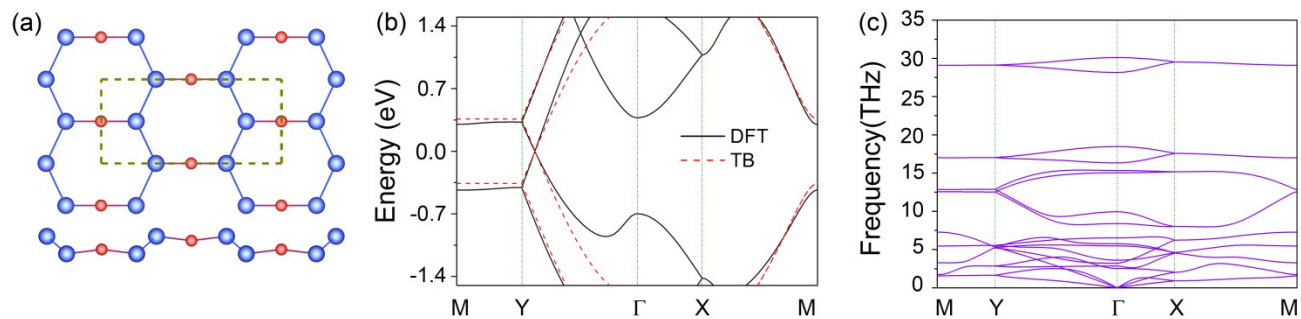

**Figure S3.** (a) Top view and side view of Si<sub>2</sub>O-II. The dashed rectangle represents the unit cell. (b) Band structure of Si<sub>2</sub>O-II from DFT and TB calculations. In TB calculation,  $t_1 = 1.0$  eV and  $t_2 = 0.36$  eV. (c) Phonon spectrum of Si<sub>2</sub>O-II.

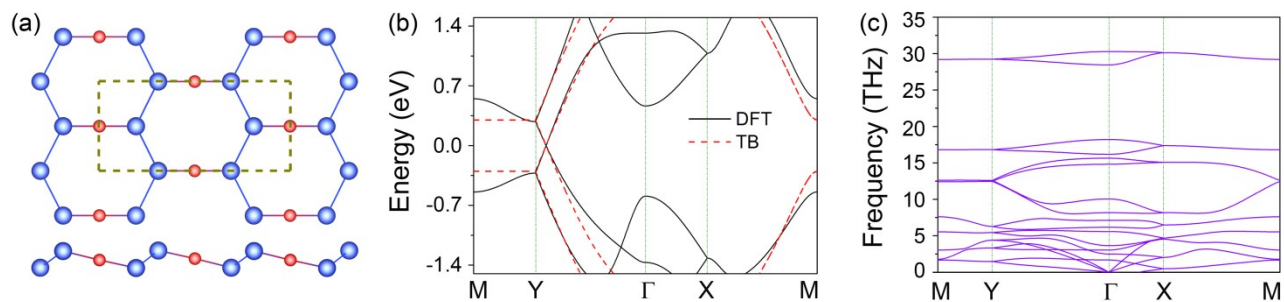

**Figure S4.** (a) Top view and side view of Si<sub>2</sub>O-III. The dashed rectangle represents the unit cell. (b) Band structure of Si<sub>2</sub>O-III from DFT and TB calculations. In TB calculation,  $t_1 = 1.0$  eV and  $t_2 = 0.30$  eV. (c) Phonon spectrum of Si<sub>2</sub>O-III.
